# Supplementary material for: Dynamic flow and shear stress as key parameters for intestinal cells morphology and polarization in an organ-on-a-chip model
Source: PubMed Central journal article supplement (PMC8520520; doi:10.1007/s10544-021-00591-y), 2021-10-16
Supplement: 10544_2021_591_MOESM1_ESM.pdf [file 10544_2021_591_MOESM1_ESM.pdf]

## Supplementary Information

### Dynamic flow and shear stress as key parameters for intestinal cells morphology and polarization in an organ-on-a-chip model

Chiara A. M. Fois, Aaron Schindeler, Peter Valtchev, Fariba Dehghani\*

School of Chemical and Biomolecular Engineering, The University of Sydney, Sydney, 2006, Australia

Centre for Advanced Food Engineering, The University of Sydney, Sydney, 2006, Australia

\*Corresponding author: [fariba.dehghani@sydney.edu.au](mailto:fariba.dehghani@sydney.edu.au)

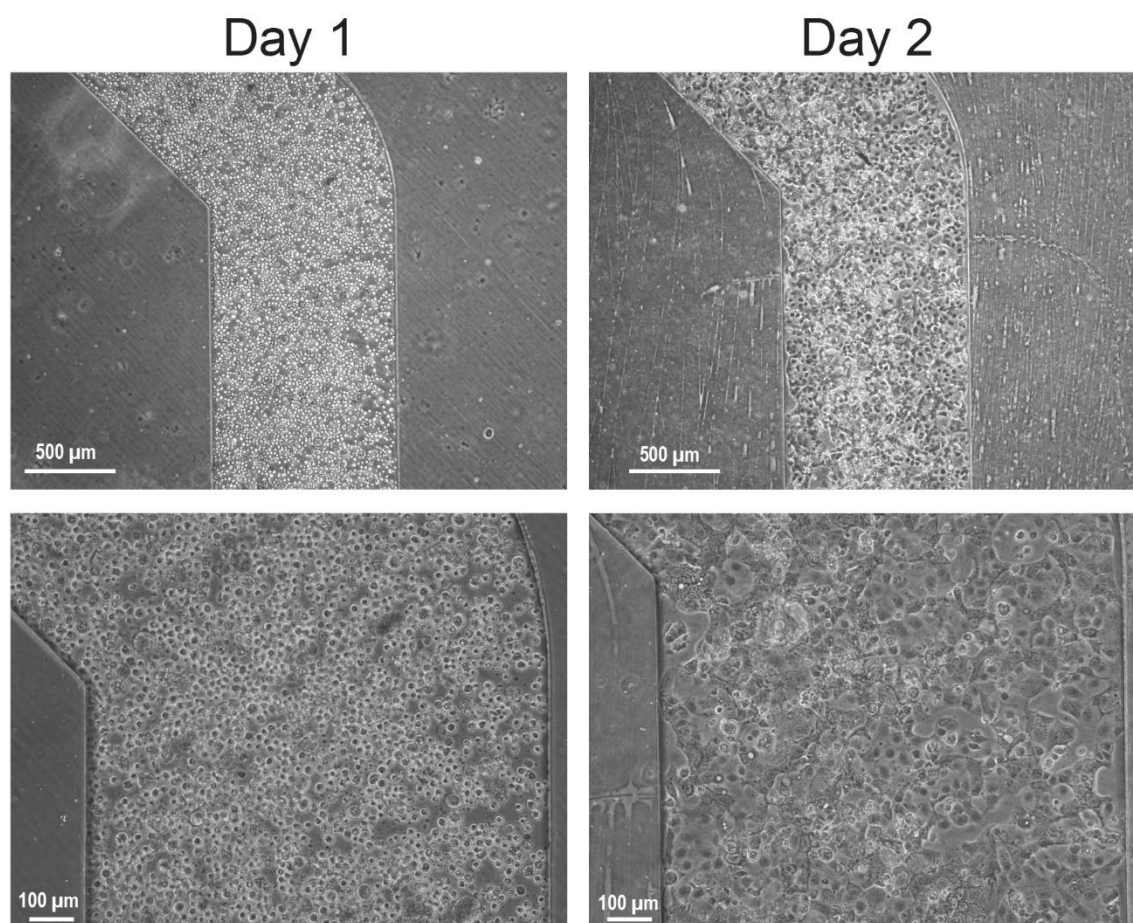

**Fig. S1** Phase-contrast grayscale images of Caco-2 cells seeded inside the gut-on-a-chip on Day 1 (seeding day) and Day 2, 24 hours post-seeding.

## Day 5 Static (S5)

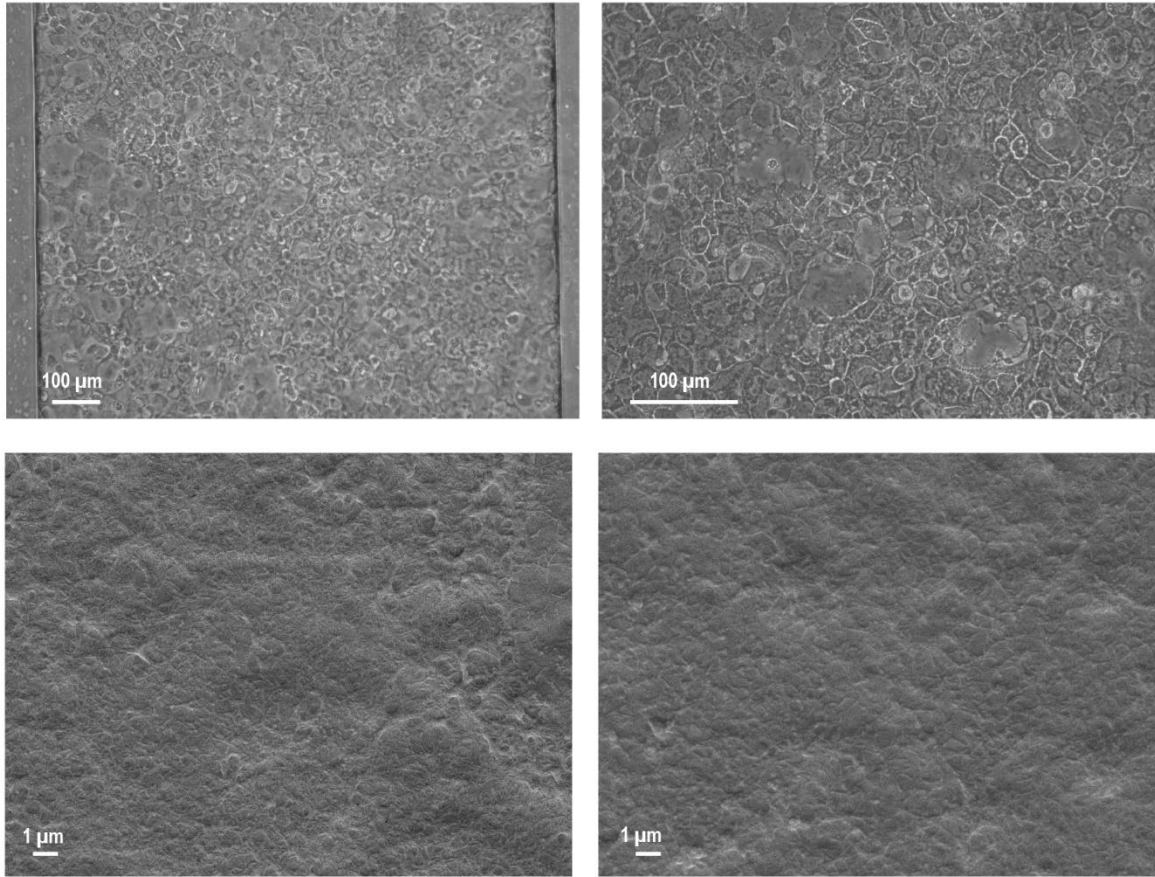

**Fig. S2** Phase-contrast grayscale images (top row) and SEM micrographs (bottom row) of Caco-2 cells grown in the gut-on-a-chip for 5 days under static conditions (no flow). No domes formation or microvilli were observed at this condition.

## Glass coverslips

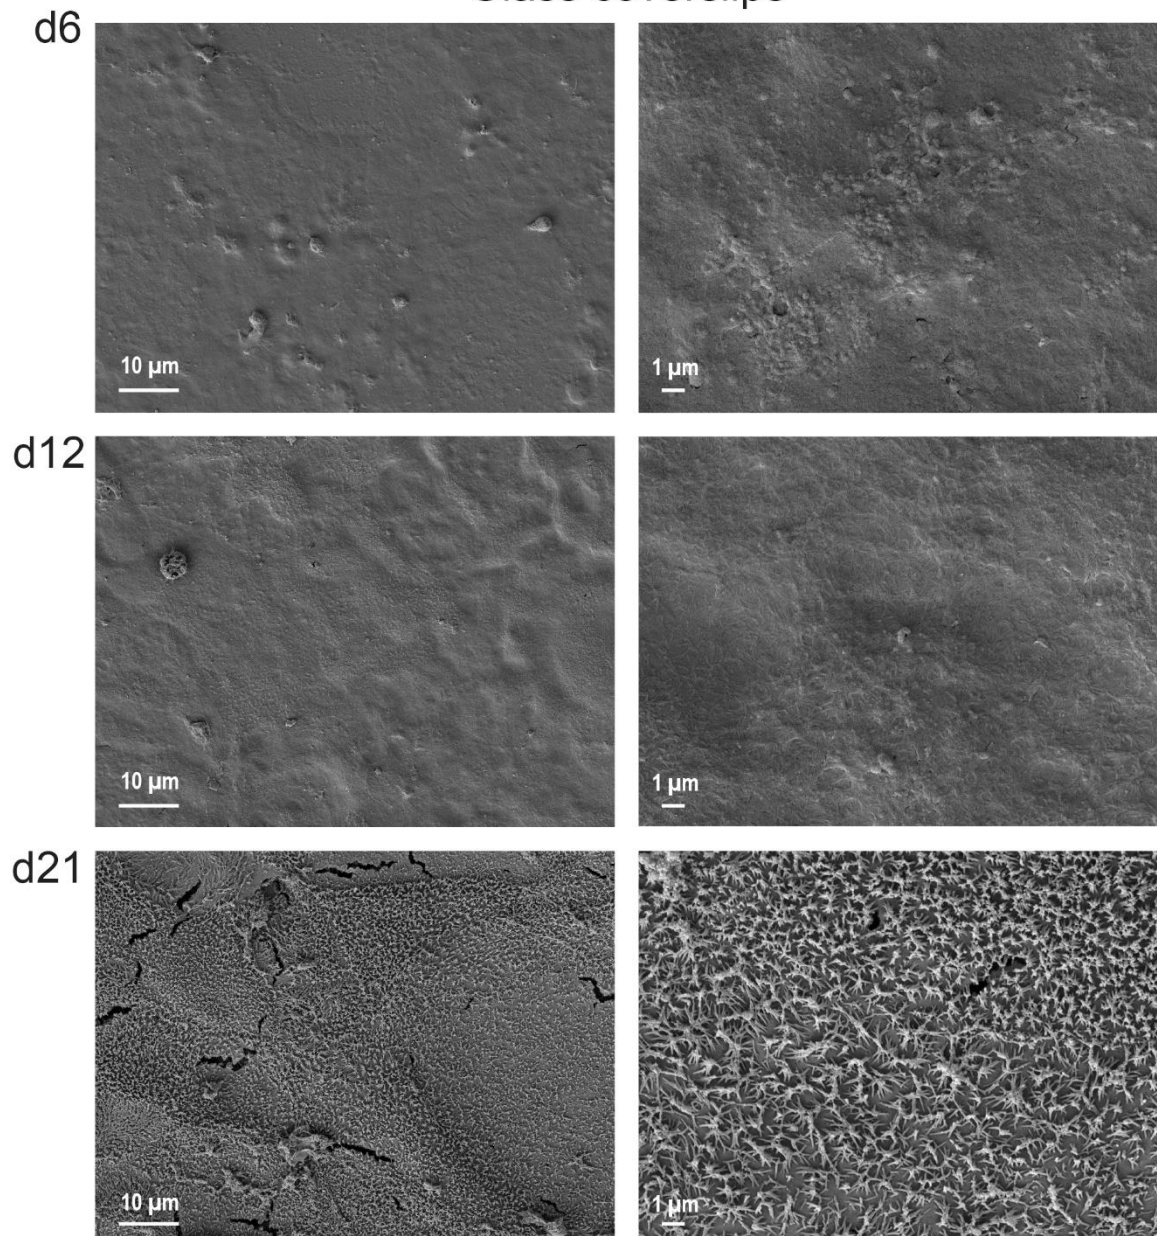

**Fig. S3** SEM micrographs of Caco-2 cells grown in static conditions on glass coverslips coated with Matrigel for 6 days (d6), 12 days (d12) and 21 days (d21). Microvilli on Caco-2 cells are visible only after 21 days under standard cell culture conditions.

**Table S1** Raw data for ddPCR genes expression analysis for the investigation of flow variation effects on Caco-2 cells. All samples at day 8 of the experimental runs. C8 = constant, D8 = decreased flow rate, S8 = static conditions on-chip. Replicate = biological replicate sample number from independent experiments.

| <b>Conditions</b> | <b>C8</b>                                       |          |          | <b>D8</b> |          | <b>S8</b> |          |          |
|-------------------|-------------------------------------------------|----------|----------|-----------|----------|-----------|----------|----------|
| <b>Replicate</b>  | <b>1</b>                                        | <b>2</b> | <b>3</b> | <b>1</b>  | <b>2</b> | <b>1</b>  | <b>2</b> | <b>3</b> |
| <b>Genes</b>      | <b>Concentration (copies/<math>\mu</math>l)</b> |          |          |           |          |           |          |          |
| GAPDH             | 2991                                            | 1526     | 3480     | 2350      | 2073     | 2240      | 1487     | 1844     |
| ACTB              | 6330                                            | 3980     | 6660     | 4630      | 5080     | 4380      | 3690     | 3940     |
| SDHA              | 258                                             | 147.9    | 254      | 231       | 180.5    | 251       | 160.1    | 194.6    |
| HPRT1             | 86.2                                            | 55       | 92.8     | 76.7      | 103.7    | 67.3      | 50.1     | 53.3     |
| ALP1 (IAP)        | 1.54                                            | 0.7      | 2.3      | 1.9       | 0.83     | 2.1       | 1.04     | 1        |
| VIL1              | 303                                             | 149.6    | 295      | 186       | 198.6    | 201       | 137.5    | 162.6    |
| TJP1              | 50.2                                            | 27.3     | 64.6     | 48.2      | 44.9     | 50.5      | 32.8     | 35.8     |
| E-Cadherin        | 58.4                                            | 22.8     | 68.1     | 25.9      | 38.9     | 28.5      | 28.3     | 33.2     |
| MUC-2             | 0.05                                            | 0.05     | 0        | 0         | 0        | 0         | 0        | 0        |
| MUC-5A            | 1.2                                             | 0.96     | 1.06     | 0.63      | 0.85     | 0.88      | 0.75     | 0.83     |
